# Supplementary figures and images for: Nutrition and Exercise for Wellness and Recovery: A Randomized Controlled Trial of a Community-Based Health Intervention
Source: Atypon-hosted journal article supplement (doi:10.1176/appi.ps.202200038), 2022-11-15

### Nutrition and Exercise for Wellness and Recovery (NEW-R) CONSORT Chart

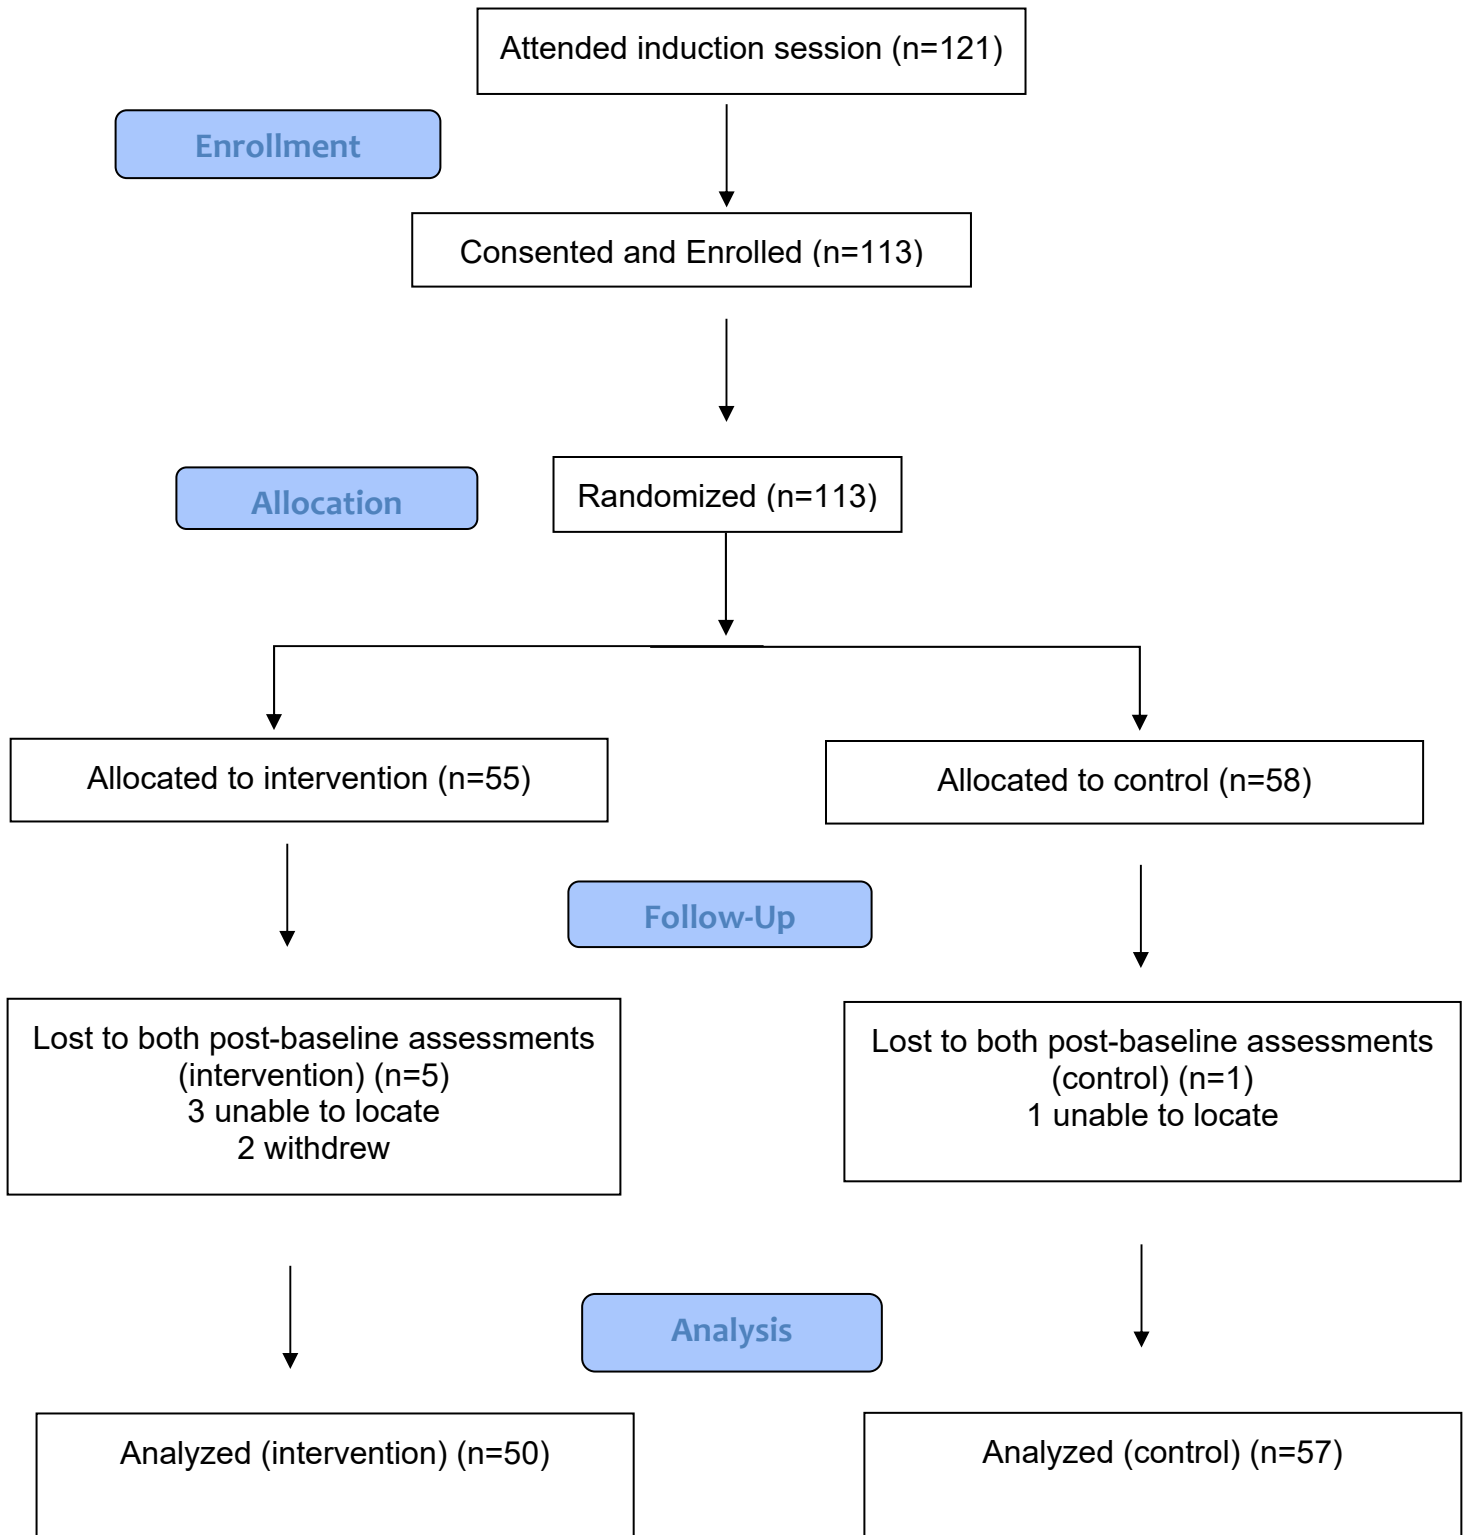

Supplement: appi.ps.202200038.ds001.pdf [file appi.ps.202200038.ds001.pdf]
